# Supplementary material for: Peptide polymer displaying potent activity against clinically isolated multidrug resistant Pseudomonas aeruginosa in vitro and in vivo
Source: Royal Society of Chemistry journal article supplement (doi:10.1039/c9bm01726g), 2019-11-19
Supplement: c9bm01726g1.pdf [file c9bm01726g1.pdf]

## Supplemental Information

### Peptide Polymers Displaying Potent Activity against Clinically Isolated

### Multi-Drug Resistant *Pseudomonas aeruginosa* *in vitro* and *in vivo*

Weinan Jiang,<sup>a,b,c</sup> Ximian Xiao,<sup>a,b,c</sup> Yueming Wu,<sup>a,b,c</sup> Weiwei Zhang,<sup>a,b,c</sup> Zihao Cong,<sup>a,b,c</sup> Jingjing Liu,<sup>a,b,c</sup> Sheng Chen,<sup>a,b,c</sup> Haodong Zhang,<sup>a,b,c</sup> Jiayang Xie,<sup>a,b,c</sup> Shuai Deng,<sup>a,b,c</sup> Minzhang Chen,<sup>a,b,c</sup> Yun Wang,<sup>d</sup> Xiaoyan Shao,<sup>d</sup> Yun Sun,<sup>d</sup> Yidong Dai,<sup>d</sup> Jian Fei,<sup>e</sup> and Runhui Liu\*<sup>a,b,c</sup>

<sup>a</sup>State Key Laboratory of Bioreactor Engineering, East China University of Science and Technology, Shanghai 200237, China

<sup>b</sup>Key Laboratory for Ultrafine Materials of Ministry of Education, East China University of Science and Technology, Shanghai 200237, China

<sup>c</sup>Research Center for Biomedical Materials of Ministry of Education, East China University of Science and Technology, Shanghai 200237, China

<sup>d</sup>Shanghai Ruijin Rehabilitation Hospital, Shanghai 200023, China

<sup>e</sup>Department of General Surgery, Ruijin Hospital Affiliated to Shanghai Jiao Tong University School of Medicine, Shanghai 200025, China

Correspondence should be addressed to R.L. (rliu@ecust.edu.cn)

**Fig. S1** GPC traces for peptide polymer batch 1 (90:10 DLL:BLG) at the sidechain protected stage.

**Fig. S2** GPC traces for peptide polymer batch 2 (90:10 DLL:BLG) at the sidechain protected stage.

**Fig. S3** GPC traces for peptide polymer batch 3 (90:10 DLL:BLG) at the sidechain protected stage.

**Fig. S4** GPC traces for peptide polymer batch 4 (90:10 DLL:BLG) at the sidechain protected stage.

**Fig. S5** GPC traces for peptide polymer batch 5 (90:10 DLL:BLG) at the sidechain protected stage.

**Fig. S6** <sup>1</sup>H NMR for peptide polymers 90:10 DLL:BLG from five batches.

**Table S1** Subunit (amino acid residue) composition of 90:10 DLL:BLG from five batches observed by <sup>1</sup>H NMR.

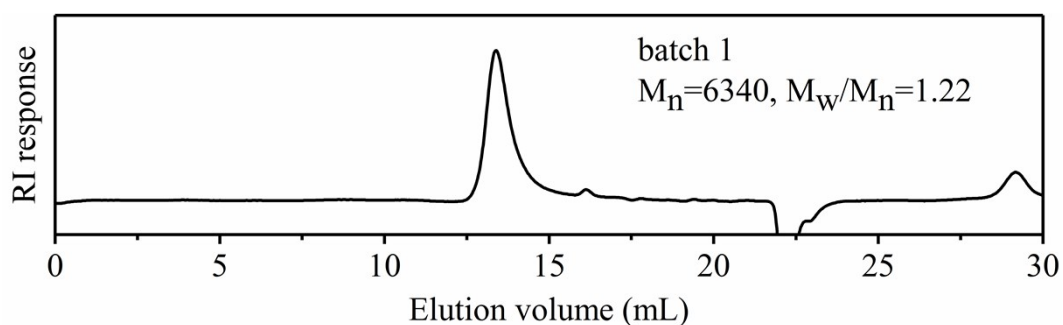

**Fig. S1** GPC trace for the peptide polymer batch 1 (90:10 DLL:BLG) at the sidechain protected stage using DMF as the mobile at a flow rate of  $1 \text{ mL min}^{-1}$ .

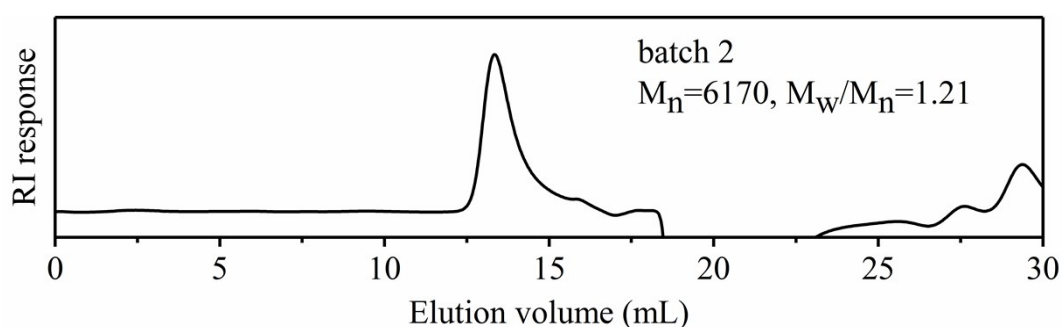

**Fig. S2** GPC trace for the peptide polymer batch 2 (90:10 DLL:BLG) at the sidechain protected stage using DMF as the mobile at a flow rate of  $1 \text{ mL min}^{-1}$ .

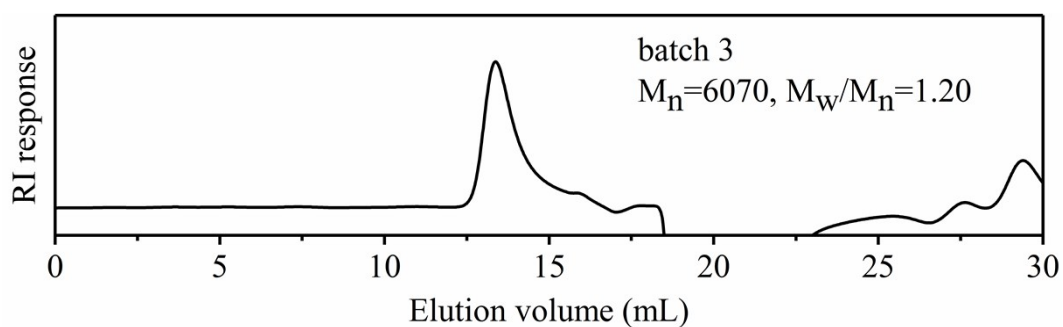

**Fig. S3** GPC trace for the peptide polymer batch 3 (90:10 DLL:BLG) at the sidechain protected stage using DMF as the mobile at a flow rate of  $1 \text{ mL min}^{-1}$ .

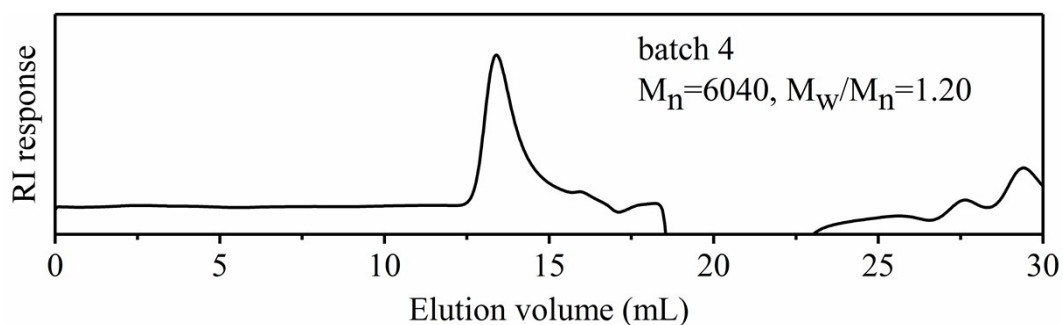

**Fig. S4** GPC trace for the peptide polymer batch 4 (90:10 DLL:BLG) at the sidechain protected stage using DMF as the mobile at a flow rate of  $1 \text{ mL min}^{-1}$ .

as the mobile at a flow rate of 1 mL min<sup>-1</sup>.

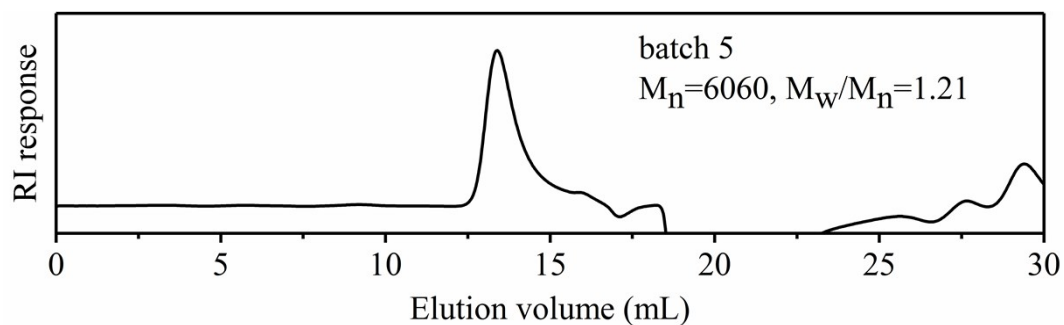

**Fig. S5** GPC trace for the peptide polymer batch 5 (90:10 DLL:BLG) at the sidechain protected stage using DMF as the mobile at a flow rate of 1 mL min<sup>-1</sup>.

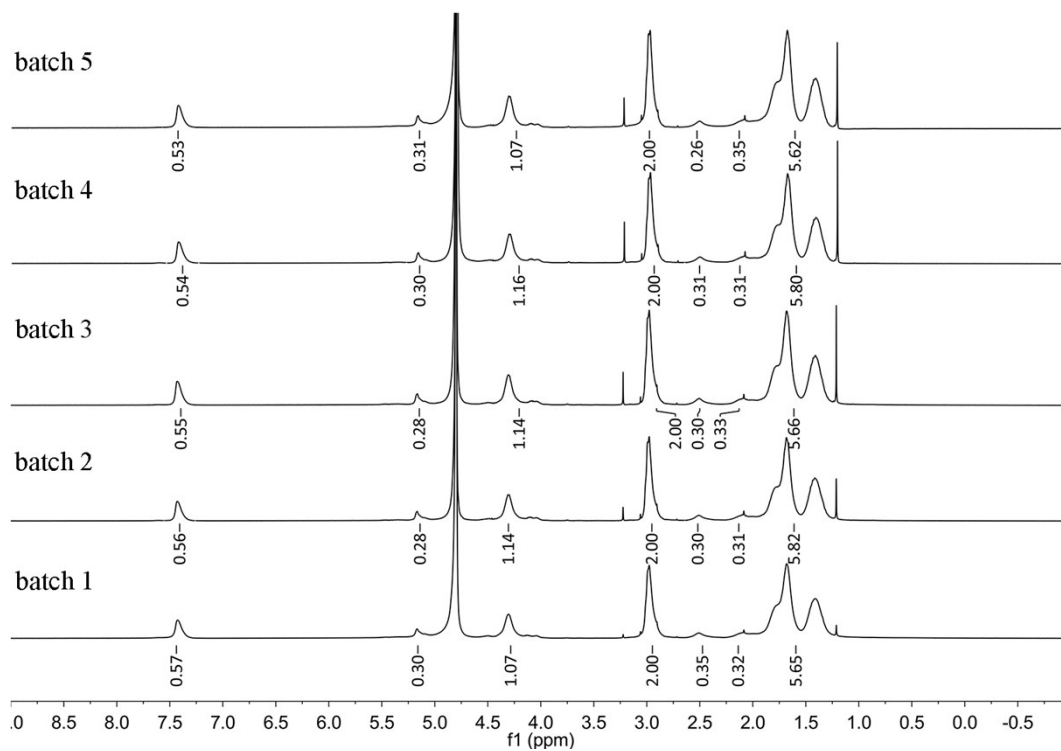

**Fig. S6** <sup>1</sup>H NMR for peptide polymers 90:10 DLL:BLG from five batches in D<sub>2</sub>O, 400 MHz.

**Table S1.** Subunit (amino acid residue) composition of peptide polymers 90:10 DLL:BLG obtained from different batches observed by <sup>1</sup>H NMR.

| Different batches | Feed ratio of<br>(Boc-DLL NCA):(BLG NCA) | Subunit composition <sup>a</sup><br>observed by <sup>1</sup> H NMR |
|-------------------|------------------------------------------|--------------------------------------------------------------------|
| batch 1           | 9:1                                      | 8.77:1                                                             |
| batch 2           | 9:1                                      | 8.93:1                                                             |
| batch 3           | 9:1                                      | 9.09:1                                                             |
| batch 4           | 9:1                                      | 9.26:1                                                             |
| batch 5           | 9:1                                      | 9.43:1                                                             |

<sup>a</sup> Subunit composition was calculated as follow:  $\text{Ratio}_{(\text{DLL}:\text{BLG})} = [\text{H}_{(\text{peak at } 2.7\sim 3.2 \text{ ppm})}/2]:[\text{H}_{(\text{peak at } 7.2\sim 7.5 \text{ ppm})}/5]$
